# Supplementary material for: Breaking the scaling relationship of ORR on carbon-based single-atom catalysts through building a local collaborative structure
Source: Royal Society of Chemistry journal article supplement (doi:10.1039/d1cy01195b), 2021-01-01
Supplement: d1cy01195b1.pdf [file d1cy01195b1.pdf]

# Breaking the Scaling Relationship of ORR on Carbon-based Single-atom Catalysts Through Building the Local Collaborative Structure

*Cehuang Fu<sup>a</sup>, Liuxuan Luo<sup>a</sup>, Lijun Yang<sup>b</sup>, Shuiyun Shen<sup>a\*</sup>, Guanghua Wei<sup>c</sup> and Junliang Zhang<sup>\*a</sup>*

## **AUTHOR ADDRESS**

a Institute of Fuel Cells, MOE Key Laboratory of Power & Machinery Engineering, School of Mechanical Engineering, Shanghai Jiao Tong University, Shanghai, China.

b MOE Key Laboratory of Mesoscopic Chemistry, Jiangsu Provincial Lab for Nanotechnology, School of Chemistry and Chemical Engineering, Nanjing University, Nanjing, China.

c SJTU-Paris Tech Elite Institute of Technology, Shanghai Jiao Tong University, Shanghai, China.

## **Calculation method**

All DFT calculations are carried on by the DMol3 of Material Studio 8.0.<sup>[1-2]</sup> The electronic exchange and correlation are calculated by the generalized gradient-corrected Perdew-Burke-

Ernzerhof functional method (GGA-PBE).<sup>[1-3]</sup> Tkatchenko-Scheffler (TS) method is applied in Dispersion-corrected DFT scheme to describe the van der Waals interactions.<sup>[4]</sup> DFT semi-core pseudopotentials (DSPP) are applied in core treatment. Double numerical plus polarization (DNP) 4.4 basis set is used to calculate the atomic orbital.<sup>[5]</sup> Spin is unrestricted during calculation. The graphite slab consists of 96 C atoms and sampled by a Monkhorst-Pack grid of 5x4x1. A vacuum slab of 15 Å is applied. The convergence tolerances are  $1 \times 10^{-5}$  Ha, 0.002 Ha/Å, 0.005 Å. The doped structures marked according to doping elements and structural symmetry as Figure S1, for example, PNC-1 represents the situation that the C atom at site 1 is taken the place of by P. The stability is evaluated by:

$$\Delta E_f = E_{structure} - E_{PNC-1/SNC-1}$$

where  $E_{structure}$  is energy of doped structure and  $E_{PNC-1/SNC-1}$  is the energy of PNC-1 or SNC-1. The most stable doped structure is used to calculate ORR process further. The distances between doping site and N are listed in Table S1.

The free energy is given as<sup>[6-7]</sup>:

$$G = E + ZPE - TS - neU$$

where  $E$  is the energy of the structure calculated with DFT,  $ZPE$  is the zero-point energy which is equal to  $\sum(h\nu_i/2)$  ( $h$  is the Planck constant and  $\nu_i$  is the vibrational frequency),  $T$  is the temperature (298.15 K),  $S$  is the entropy of the structure,  $n$  is the number of electrons transferred in elementary reaction,  $e$  is the charge constant and  $U$  is the potential. The entropy is calculated by vibrational frequency.<sup>[6-7]</sup>

H<sub>2</sub> and H<sub>2</sub>O are calculated with DFT.  $G_{H_2O(l)} = G_{H_2O(g)} + RT \times \ln(P/P_0)$  is used to get the energy of H<sub>2</sub>O, where  $R$  is gas constant,  $P_0 = 1$  bar and  $P = 0.035$  bar. The energy of (H<sup>+</sup>+e<sup>-</sup>) is defined as the half time that of H<sub>2</sub> on the standard condition that  $U = 0$  and  $pH = 0$ . The free energy of O<sub>2</sub> is calculated according to thermodynamic energy of 4.92 eV released by the reaction of  $2H_2 + O_2 \rightarrow 2H_2O$ .<sup>[6-7]</sup> The thermodynamic energy released by the reaction of  $H_2 + O_2 \rightarrow H_2O_2$  is - 1.39 eV.

The elementary reactions of 4e<sup>-</sup> mechanism could be described as followed:

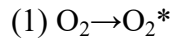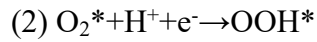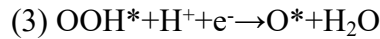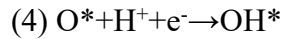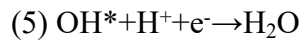

And the elementary reactions of 2e<sup>-</sup> mechanism could be described as followed:

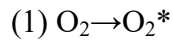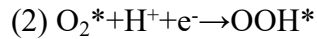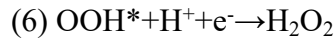

It is worth mentioned that the processes of  $O_2 \rightarrow 2O^*$  and  $O_2^* + H^+ + e^- \rightarrow O^* + OH^*$  are not considered in our calculation. Cd, Hg are not considered because of their toxicity. Thus, only

structures of M-N<sub>4</sub> (M is one of the transitions metals including Cr, Mn, Fe, Co, Ni, Cu, Zn, Rh, Ru, Rh, Pd, Ag, Ir, Pt, Au) are calculated in our work.

The adsorption energies of intermediate adsorbates (energies of all states in energy diagram of ORR process) are calculated as:

$$\Delta G_{O_2^*} = G_{O_2^*} - G_{slab} - G_{O_2}$$

$$\Delta G_{OOH^*} = G_{OOH^*} - G_{slab} - G_{O_2} - (G_{H^+} + G_{e^-})$$

$$\Delta G_{O^*} = G_{O^*} - G_{slab} - G_{O_2} - 2(G_{H^+} + G_{e^-}) + G_{H_2O}$$

$$\Delta G_{OH^*} = G_{OH^*} - G_{slab} - G_{O_2} - 3(G_{H^+} + G_{e^-}) + G_{H_2O}$$

where  $G_{slab}$ ,  $G_{O_2}$ ,  $G_{H_2O}$  and  $(G_{H^+} + G_{e^-})$  are free energy of clean slab, O<sub>2</sub> and proton-electron couple.  $G_{O_2^*}$ ,  $G_{OOH^*}$ ,  $G_{O^*}$  and  $G_{OH^*}$  are the energy of the slab with adsorbates. When the  $\Delta G$  of elementary reaction is positive, the reaction is considered not to happen thermodynamically. Thus, the onset potential could be evaluated by the max energy released in elementary reaction at 0V:

$$U_{onset} = -(\max \Delta G) / e$$

The stability of metal atoms could be evaluated by the dissolution potential by<sup>[8]</sup>:

$$-eU_{dis} = G_{N_4} + G_{metal-ion} + nG_{e^-} - G_{M-N_4}$$

where  $G_{metal-ion} + nG_{e^-}$  could be calculated by standard electrode potentials of Table S2.

**Table S1.** The distance between doped site and metal atom.

| Site Number | $D_{M/doped\ site}(\text{\AA})$ | Site Number | $D_{M/doped\ site}(\text{\AA})$ | Site Number | $D_{M/doped\ site}(\text{\AA})$ |
|-------------|---------------------------------|-------------|---------------------------------|-------------|---------------------------------|
| 1           | 3.019                           | 9           | 6.079                           | 17          | 7.806                           |
| 2           | 2.638                           | 10          | 6.788                           | 18          | 7.184                           |
| 3           | 4.001                           | 11          | 4.897                           | 19          | 8.181                           |
| 4           | 5.010                           | 12          | 5.774                           | 20          | 7.994                           |
| 5           | 6.333                           | 13          | 5.517                           | 21          | 9.227                           |
| 6           | 3.448                           | 14          | 6.759                           | 22          | 9.396                           |
| 7           | 4.292                           | 15          | 6.996                           |             |                                 |
| 8           | 4.675                           | 16          | 8.376                           |             |                                 |

**Table S2.** The standard electrode potentials of transition metals.

| Reaction                                      | Potential ( $E^0$ ) | Reaction                                      | Potential ( $E^0$ ) |
|-----------------------------------------------|---------------------|-----------------------------------------------|---------------------|
| $\text{Cr} \rightarrow \text{Cr}^{3+} + 3e^-$ | -0.744              | $\text{Ru} \rightarrow \text{Ru}^{2+} + 2e^-$ | 0.455               |
| $\text{Mn} \rightarrow \text{Mn}^{2+} + 2e^-$ | -1.185              | $\text{Rh} \rightarrow \text{Rh}^{3+} + 3e^-$ | 0.800               |
| $\text{Fe} \rightarrow \text{Fe}^{2+} + 2e^-$ | -0.447              | $\text{Pd} \rightarrow \text{Pd}^{2+} + 2e^-$ | 0.951               |
| $\text{Co} \rightarrow \text{Co}^{2+} + 2e^-$ | -0.280              | $\text{Ag} \rightarrow \text{Ag}^+ + e^-$     | 0.799               |
| $\text{Ni} \rightarrow \text{Ni}^{2+} + 2e^-$ | -0.257              | $\text{Ir} \rightarrow \text{Ir}^{3+} + 3e^-$ | 1.000               |
| $\text{Cu} \rightarrow \text{Cu}^{2+} + 2e^-$ | -0.340              | $\text{Pt} \rightarrow \text{Pt}^{2+} + 2e^-$ | 1.180               |
| $\text{Zn} \rightarrow \text{Zn}^{2+} + 2e^-$ | -0.762              | $\text{Au} \rightarrow \text{Au}^+ + e^-$     | 1.692               |

**Table S3.** The dissolution potentials of metal atoms of P-doped M-N<sub>4</sub>.

|           | Cr   | Mn    | Fe    | Co    | Ni    | Cu    | Zn    | Ru    | Rh    | Pd    | Ag    | Ir    | Pt    | Au    |
|-----------|------|-------|-------|-------|-------|-------|-------|-------|-------|-------|-------|-------|-------|-------|
| <b>1</b>  | 0.78 | -0.82 | -1.61 | -1.97 | -2.08 | -1.96 | -0.76 | -1.41 | -4.57 | -4.20 | -1.13 | -4.98 | -4.73 | -2.34 |
| <b>2</b>  | 1.12 | -0.36 | -1.17 | -1.54 | -1.54 | -1.56 | -0.39 | -0.99 | -4.15 | -3.88 | -0.98 | -4.56 | -4.37 | -1.84 |
| <b>3</b>  | 1.17 | -0.35 | -1.18 | -1.56 | -1.76 | -1.72 | -0.43 | -0.82 | -4.04 | -3.94 | -1.14 | -4.35 | -4.41 | -2.00 |
| <b>4</b>  | 0.78 | -0.73 | -1.61 | -2.04 | -2.15 | -1.99 | -0.81 | -1.29 | -4.55 | -4.36 | -1.33 | -4.92 | -4.84 | -2.21 |
| <b>5</b>  | 0.72 | -0.82 | -1.68 | -2.08 | -2.25 | -2.04 | -0.86 | -1.32 | -4.54 | -4.40 | -1.31 | -4.89 | -4.90 | -2.32 |
| <b>6</b>  | 1.13 | -0.25 | -1.21 | -1.68 | -1.68 | -1.73 | -0.50 | -1.19 | -4.45 | -4.02 | -1.40 | -4.79 | -4.52 | -1.73 |
| <b>7</b>  | 0.83 | -0.75 | -1.64 | -2.06 | -2.27 | -2.06 | -0.79 | -1.17 | -4.44 | -4.39 | -1.09 | -4.77 | -4.85 | -2.37 |
| <b>8</b>  | 0.48 | -1.10 | -1.92 | -2.31 | -2.42 | -2.25 | -1.07 | -1.51 | -4.75 | -4.61 | -1.30 | -5.13 | -5.10 | -2.64 |
| <b>9</b>  | 0.82 | -0.72 | -1.60 | -2.03 | -2.20 | -1.98 | -0.78 | -1.19 | -4.46 | -4.34 | -1.24 | -4.79 | -4.81 | -2.17 |
| <b>10</b> | 0.67 | -0.87 | -1.75 | -2.19 | -2.31 | -2.04 | -0.91 | -1.37 | -4.64 | -4.42 | -1.34 | -5.00 | -4.93 | -2.28 |
| <b>11</b> | 0.67 | -0.91 | -1.83 | -2.25 | -2.40 | -2.14 | -0.95 | -1.41 | -4.66 | -4.49 | -1.31 | -5.02 | -5.02 | -2.39 |
| <b>12</b> | 0.88 | -0.66 | -1.58 | -2.03 | -2.16 | -1.94 | -0.73 | -1.19 | -4.48 | -4.30 | -1.22 | -4.81 | -4.78 | -2.07 |
| <b>13</b> | 0.82 | -0.88 | -1.71 | -2.14 | -2.31 | -2.03 | -0.77 | -1.16 | -4.44 | -4.29 | -1.15 | -4.79 | -4.82 | -2.26 |
| <b>14</b> | 0.85 | -0.88 | -1.65 | -2.09 | -2.27 | -2.00 | -0.75 | -1.14 | -4.43 | -4.35 | -1.15 | -4.76 | -4.81 | -2.21 |
| <b>15</b> | 0.75 | -0.94 | -1.69 | -2.11 | -2.27 | -2.02 | -0.81 | -1.24 | -4.48 | -4.31 | -1.20 | -4.83 | -4.84 | -2.31 |
| <b>16</b> | 0.76 | -0.96 | -0.49 | -2.11 | -2.29 | -2.04 | -0.82 | -1.22 | -4.48 | -4.34 | -0.97 | -3.56 | -4.85 | -2.25 |
| <b>17</b> | 0.81 | -0.84 | -1.66 | -2.11 | -2.25 | -2.00 | -0.77 | -1.24 | -4.52 | -4.32 | -1.26 | -4.85 | -4.82 | -2.11 |
| <b>18</b> | 0.80 | -0.85 | -1.69 | -2.13 | -2.29 | -2.02 | -0.79 | -1.22 | -4.48 | -4.33 | -1.20 | -3.86 | -4.84 | -2.20 |
| <b>19</b> | 0.80 | -0.88 | -1.69 | -2.11 | -2.30 | -2.03 | -0.80 | -1.19 | -4.46 | -4.33 | -0.90 | -3.81 | -3.74 | -2.25 |
| <b>20</b> | 0.77 | -0.96 | -1.73 | -2.16 | -2.34 | -2.06 | -0.81 | -1.19 | -4.47 | -4.40 | -1.16 | -4.56 | -3.67 | -2.26 |
| <b>21</b> | 0.85 | -0.92 | -1.66 | -2.10 | -2.27 | -2.00 | -0.75 | -1.15 | -4.40 | -4.24 | -1.16 | -4.76 | -3.57 | -2.16 |
| <b>22</b> | 0.77 | -0.97 | -1.69 | -2.12 | -2.30 | -2.06 | -0.80 | -1.20 | -4.44 | -4.36 | -0.93 | -3.61 | -3.55 | -2.26 |

**Table S4.** The dissolution potentials of metal atoms of S-doped M-N<sub>4</sub>.

| Cr | Mn | Fe | Co | Ni | Cu | Zn | Ru | Rh | Pd | Ag | Ir | Pt | Au |
|----|----|----|----|----|----|----|----|----|----|----|----|----|----|
|----|----|----|----|----|----|----|----|----|----|----|----|----|----|

|           |      |      |       |       |       |       |      |       |       |       |       |       |       |       |
|-----------|------|------|-------|-------|-------|-------|------|-------|-------|-------|-------|-------|-------|-------|
| <b>1</b>  | 2.33 | 0.81 | -0.12 | -0.54 | -0.69 | -0.51 | 0.69 | 0.09  | -3.07 | -2.66 | 0.04  | -3.41 | -3.14 | -0.45 |
| <b>2</b>  | 2.92 | 1.40 | 0.44  | 0.03  | 0.14  | -0.01 | 1.33 | 0.66  | -2.51 | -2.08 | 0.50  | -2.86 | -2.51 | -0.51 |
| <b>3</b>  | 2.63 | 1.11 | 0.24  | -0.16 | -0.31 | -0.22 | 1.02 | 0.56  | -2.67 | -2.49 | 0.27  | -2.99 | -2.96 | -0.29 |
| <b>4</b>  | 2.18 | 0.64 | -0.26 | -0.67 | -0.78 | -0.62 | 0.57 | 0.07  | -3.18 | -2.95 | -0.02 | -3.54 | -3.43 | -0.71 |
| <b>5</b>  | 1.95 | 0.40 | -0.48 | -0.85 | -1.03 | -0.82 | 0.36 | -0.12 | -3.35 | -3.16 | -0.10 | -3.71 | -3.69 | -0.98 |
| <b>6</b>  | 3.10 | 1.68 | 0.68  | 0.17  | 0.29  | 0.14  | 1.48 | 0.59  | -2.60 | -1.94 | 0.30  | -2.93 | -2.43 | 0.29  |
| <b>7</b>  | 2.46 | 0.89 | -0.03 | -0.47 | -0.60 | -0.49 | 0.78 | 0.38  | -2.90 | -2.72 | 0.26  | -3.22 | -3.18 | -0.49 |
| <b>8</b>  | 1.99 | 0.45 | -0.42 | -0.84 | -0.98 | -0.80 | 0.39 | 0.02  | -3.26 | -3.12 | 0.00  | -3.59 | -3.59 | -0.94 |
| <b>9</b>  | 2.09 | 0.52 | -0.38 | -0.78 | -0.94 | -0.71 | 0.49 | 0.02  | -3.25 | -3.08 | 0.01  | -3.60 | -3.56 | -0.85 |
| <b>10</b> | 2.06 | 0.50 | -0.40 | -0.81 | -0.95 | -0.73 | 0.46 | 0.00  | -3.27 | -3.03 | -0.05 | -3.61 | -3.54 | -0.85 |
| <b>11</b> | 1.92 | 0.35 | -0.59 | -0.99 | -1.15 | -0.90 | 0.30 | -0.17 | -3.44 | -3.24 | -0.12 | -3.80 | -3.77 | -1.01 |
| <b>12</b> | 2.20 | 0.63 | -0.29 | -0.74 | -0.86 | -0.63 | 0.59 | 0.09  | -3.18 | -2.97 | 0.07  | -3.40 | -3.46 | -0.68 |
| <b>13</b> | 2.12 | 0.50 | -0.41 | -0.86 | -1.01 | -0.73 | 0.52 | 0.12  | -3.17 | -2.98 | 0.07  | -3.51 | -3.51 | -0.80 |
| <b>14</b> | 2.06 | 0.44 | -0.46 | -0.90 | -1.06 | -0.79 | 0.76 | 0.04  | -3.24 | -3.15 | 0.04  | -3.59 | -3.61 | -0.92 |
| <b>15</b> | 1.98 | 0.40 | 1.77  | -0.91 | -1.08 | -0.82 | 0.40 | 0.00  | -3.26 | -3.15 | 0.01  | -3.60 | -3.63 | -0.98 |
| <b>16</b> | 2.01 | 0.43 | -0.46 | -0.90 | -1.05 | -0.79 | 0.42 | -0.02 | -3.28 | -3.13 | 0.28  | -3.62 | -3.63 | -0.92 |
| <b>17</b> | 2.08 | 0.50 | -0.41 | -0.87 | -1.00 | -0.73 | 0.49 | 0.01  | -3.27 | -3.05 | 0.00  | -3.61 | -3.56 | -0.83 |
| <b>18</b> | 2.04 | 0.44 | -0.47 | -0.92 | -1.07 | -0.79 | 0.44 | 0.01  | -3.28 | -3.10 | 0.02  | -3.62 | -3.61 | -0.89 |
| <b>19</b> | 2.00 | 0.40 | -0.50 | -0.94 | -1.11 | -0.84 | 0.40 | -0.01 | -3.29 | -3.13 | 0.02  | -1.55 | -3.66 | -0.94 |
| <b>20</b> | 2.01 | 0.40 | -0.50 | -0.94 | -1.11 | -0.83 | 0.42 | 0.02  | -3.26 | -3.11 | 0.03  | -3.60 | -1.41 | -0.93 |
| <b>21</b> | 2.08 | 0.45 | -0.45 | -0.90 | -1.06 | -0.78 | 0.48 | 0.06  | -3.20 | -3.03 | 0.35  | -3.57 | -1.31 | -0.92 |
| <b>22</b> | 2.02 | 0.40 | -0.49 | -0.92 | -1.09 | -0.81 | 0.42 | 0.01  | -3.24 | -2.65 | 0.29  | -1.36 | -3.62 | -0.95 |

**Table S5.** ORR processes on none-doped M-N<sub>4</sub> and P/S-doped M-N<sub>4</sub>(P and S are oxidized by O<sup>\*</sup>). ↓ is used to describe stronger adsorption and ↑ means weaker adsorption.

|                         | <b>O<sub>2</sub><sup>*</sup></b> | <b>OOH<sup>*</sup></b> | <b>O<sup>*</sup></b> | <b>OH<sup>*</sup></b> |
|-------------------------|----------------------------------|------------------------|----------------------|-----------------------|
| <b>Cr-N<sub>4</sub></b> | -1.092                           | -1.724                 | -4.927               | -5.063                |

|                          |          |          |          |          |
|--------------------------|----------|----------|----------|----------|
| <b>Cr-PN<sub>4</sub></b> | -0.948 ↑ | -1.995 ↓ | -4.876 ↑ | -5.216 ↓ |
| <b>Cr-SN<sub>4</sub></b> | -0.992 ↑ | -1.784 ↓ | -4.899 ↑ | -5.096 ↓ |
| <b>Mn-N<sub>4</sub></b>  | -0.618   | -1.314   | -3.959   | -4.611   |
| <b>Mn-PN<sub>4</sub></b> | -0.543 ↑ | -1.549 ↓ | -3.913 ↑ | -4.794 ↓ |
| <b>Mn-SN<sub>4</sub></b> | -0.602 ↑ | -1.426 ↓ | -3.945 ↓ | -4.733 ↓ |
| <b>Fe-N<sub>4</sub></b>  | -0.588   | -1.282   | -3.407   | -4.397   |
| <b>Fe-PN<sub>4</sub></b> | -0.365 ↑ | -1.457 ↓ | -3.230 ↑ | -4.534 ↓ |
| <b>Fe-SN<sub>4</sub></b> | -0.560 ↑ | -1.427 ↓ | -3.353 ↑ | -4.467 ↓ |
| <b>Co-N<sub>4</sub></b>  | -0.313   | -0.807   | -2.159   | -3.902   |
| <b>Co-PN<sub>4</sub></b> | -0.194 ↑ | -0.979 ↓ | -1.941 ↑ | -3.867 ↑ |
| <b>Co-SN<sub>4</sub></b> | -0.272 ↑ | -0.933 ↓ | -2.178 ↓ | -3.945 ↓ |
| <b>Ni-N<sub>4</sub></b>  | 0.065    | -0.035   | -0.947   | -3.017   |
| <b>Ni-N<sub>4</sub>P</b> | 0.181 ↑  | -0.383 ↓ | -0.635 ↑ | -3.198 ↓ |
| <b>Ni-N<sub>4</sub>S</b> | 0.164 ↑  | -0.092 ↓ | -0.702 ↓ | -3.126 ↑ |
| <b>Cu-N<sub>4</sub></b>  | 0.115    | -0.105   | -0.677   | -3.094   |
| <b>Cu-N<sub>4</sub>P</b> | 0.195 ↑  | -0.214 ↓ | -0.796 ↓ | -3.129 ↓ |
| <b>Cu-N<sub>4</sub>S</b> | 0.127 ↑  | -0.177 ↓ | -0.794 ↓ | -3.274 ↓ |
| <b>Zn-N<sub>4</sub></b>  | 0.306    | -0.799   | -1.424   | -4.068   |
| <b>Zn-N<sub>4</sub>P</b> | 0.763 ↑  | -1.219 ↓ | -0.750 ↑ | -4.080 ↓ |
| <b>Zn-N<sub>4</sub>S</b> | 0.618 ↓  | -1.185 ↓ | -0.974 ↑ | -4.234 ↓ |
| <b>Ru-N<sub>4</sub></b>  | -1.161   | -1.727   | -4.049   | -4.808   |
| <b>Ru-N<sub>4</sub>P</b> | -0.920 ↑ | -1.841 ↓ | -3.999 ↑ | -4.806 ↑ |
| <b>Ru-N<sub>4</sub>S</b> | -0.995 ↑ | -1.703 ↑ | -3.915 ↑ | -4.750 ↑ |
| <b>Rh-N<sub>4</sub></b>  | -0.093   | -0.734   | -2.105   | -3.850   |
| <b>Rh-N<sub>4</sub>P</b> | -0.032 ↑ | -1.036 ↓ | -2.098 ↑ | -3.947 ↓ |
| <b>Rh-N<sub>4</sub>S</b> | -0.116 ↓ | -0.78 ↓  | -1.982 ↑ | -3.800 ↑ |
| <b>Pd-N<sub>4</sub></b>  | 0.777    | 0.291    | -0.273   | -2.548   |



|                          |          |          |          |          |
|--------------------------|----------|----------|----------|----------|
| <b>Pd-N<sub>4</sub>P</b> | 0.170 ↓  | 0.032 ↓  | 0.026 ↑  | -2.636 ↓ |
| <b>Pd-N<sub>4</sub>S</b> | 0.857 ↑  | 0.290 ↓  | 0.053 ↑  | -2.446 ↑ |
| <b>Ag-N<sub>4</sub></b>  | -0.154   | -0.896   | -1.371   | -3.972   |
| <b>Ag-N<sub>4</sub>P</b> | 0.193 ↑  | -0.754 ↑ | -1.349 ↑ | -3.642 ↑ |
| <b>Ag-N<sub>4</sub>S</b> | 0.309 ↑  | -0.563 ↑ | -0.975 ↑ | -3.587 ↑ |
| <b>Ir-N<sub>4</sub></b>  | -0.043   | -0.669   | -2.416   | -3.822   |
| <b>Ir-N<sub>4</sub>P</b> | -0.037 ↑ | -1.046 ↓ | -2.570 ↓ | -4.041 ↓ |
| <b>Ir-N<sub>4</sub>S</b> | 0.044 ↑  | -0.757 ↓ | -2.275 ↑ | -3.870 ↓ |
| <b>Pt-N<sub>4</sub></b>  | 0.116    | 0.354    | -0.293   | -2.535   |
| <b>Pt-N<sub>4</sub>P</b> | 0.185 ↑  | 0.033 ↓  | -0.321 ↓ | -2.751 ↓ |
| <b>Pt-N<sub>4</sub>S</b> | 0.830 ↑  | 0.136 ↓  | -0.231 ↑ | -2.563 ↓ |
| <b>Au-N<sub>4</sub></b>  | 0.579    | 0.083    | -0.238   | -2.710   |
| <b>Au-N<sub>4</sub>P</b> | 0.615 ↑  | -0.171 ↓ | -0.895 ↓ | -2.721 ↓ |
| <b>Au-N<sub>4</sub>S</b> | 0.680 ↑  | 0.045 ↓  | -0.306 ↓ | -2.731 ↓ |

**Table S6.** ORR processes on none-doped M-N<sub>4</sub> and P/S-doped M-N<sub>4</sub> without vdW interaction. ↓ is used to describe stronger adsorption and ↑ means weaker adsorption.

|                          | <b>O<sub>2</sub>*</b> | <b>OOH*</b> | <b>O*</b> | <b>OH*</b> |
|--------------------------|-----------------------|-------------|-----------|------------|
| <b>Cr-N<sub>4</sub></b>  | -0.966                | -1.567      | -4.857    | -4.959     |
| <b>Cr-PN<sub>4</sub></b> | -0.813 ↑              | -1.815 ↓    | -4.785 ↑  | -5.094     |
| <b>Cr-SN<sub>4</sub></b> | -0.850 ↑              | -1.595 ↓    | -4.811 ↑  | -4.971     |
| <b>Mn-N<sub>4</sub></b>  | -0.435                | -1.101      | -3.840    | -4.453     |
| <b>Mn-PN<sub>4</sub></b> | -0.338 ↑              | -1.392 ↓    | -3.821 ↑  | -4.675 ↓   |
| <b>Mn-SN<sub>4</sub></b> | -0.462                | -1.260 ↓    | -3.808 ↑  | -4.609 ↓   |
| <b>Fe-N<sub>4</sub></b>  | -0.450                | -1.118      | -3.329    | -4.279     |
| <b>Fe-PN<sub>4</sub></b> | -0.314 ↑              | -1.375 ↓    | -3.244 ↑  | -4.509 ↓   |
| <b>Fe-SN<sub>4</sub></b> | -0.408 ↑              | -1.239 ↓    | -3.303 ↑  | -4.343 ↓   |

|                          |          |          |          |          |
|--------------------------|----------|----------|----------|----------|
| <b>Co-N<sub>4</sub></b>  | -0.174   | -0.635   | -2.082   | -3.783   |
| <b>Co-PN<sub>4</sub></b> | -0.100 ↑ | -0.978 ↓ | -1.952 ↑ | -3.932 ↓ |
| <b>Co-SN<sub>4</sub></b> | -0.122 ↑ | -0.745 ↓ | -1.844 ↑ | -3.823 ↓ |
| <b>Ni-N<sub>4</sub></b>  | 0.307    | 0.225    | -0.861   | -2.838   |
| <b>Ni-N<sub>4</sub>P</b> | 0.706 ↑  | -0.096 ↓ | -0.823 ↑ | -2.975 ↓ |
| <b>Ni-N<sub>4</sub>S</b> | 0.805 ↑  | 0.229 ↑  | -0.827 ↑ | -2.901 ↓ |
| <b>Cu-N<sub>4</sub></b>  | 0.330    | 0.124    | -0.490   | -3.018   |
| <b>Cu-N<sub>4</sub>P</b> | 0.445 ↑  | -0.055 ↓ | -0.353 ↑ | -3.078 ↓ |
| <b>Cu-N<sub>4</sub>S</b> | 0.316 ↓  | -0.004 ↓ | -1.004 ↓ | -3.168 ↓ |
| <b>Zn-N<sub>4</sub></b>  | 0.353    | -0.692   | -1.234   | -4.077   |
| <b>Zn-N<sub>4</sub>P</b> | 0.519 ↑  | -0.725 ↓ | -0.965 ↑ | -3.950 ↑ |
| <b>Zn-N<sub>4</sub>S</b> | 0.389 ↑  | -0.739 ↓ | -1.189 ↑ | -4.109 ↓ |
| <b>Ru-N<sub>4</sub></b>  | -1.000   | -1.535   | -3.947   | -4.669   |
| <b>Ru-N<sub>4</sub>P</b> | -0.886 ↑ | -1.777 ↓ | -3.933 ↑ | -4.802 ↓ |
| <b>Ru-N<sub>4</sub>S</b> | -0.855 ↑ | -1.549 ↓ | -3.832 ↑ | -4.631 ↓ |
| <b>Rh-N<sub>4</sub></b>  | -0.110   | -0.575   | -2.035   | -3.730   |
| <b>Rh-N<sub>4</sub>P</b> | -0.072 ↑ | -0.857 ↓ | -2.044 ↓ | -3.827 ↓ |
| <b>Rh-N<sub>4</sub>S</b> | 0.023 ↑  | -0.579 ↓ | -1.899 ↑ | -3.671 ↑ |
| <b>Pd-N<sub>4</sub></b>  | 0.250    | 0.452    | 0.046    | -2.464   |
| <b>Pd-N<sub>4</sub>P</b> | 0.277 ↑  | 0.218 ↓  | 0.009 ↓  | -2.490 ↓ |
| <b>Pd-N<sub>4</sub>S</b> | 0.261 ↑  | 0.482 ↑  | 0.258 ↑  | -2.351 ↑ |
| <b>Ag-N<sub>4</sub></b>  | -0.030   | -0.766   | -1.314   | -3.899   |
| <b>Ag-N<sub>4</sub>P</b> | 0.314 ↑  | -0.619 ↑ | -0.940 ↑ | -3.550 ↑ |
| <b>Ag-N<sub>4</sub>S</b> | 0.372 ↑  | -0.430 ↑ | -0.918 ↑ | -3.538 ↑ |
| <b>Ir-N<sub>4</sub></b>  | 0.068    | -0.518   | -2.367   | 3.739    |
| <b>Ir-N<sub>4</sub>P</b> | 0.090 ↑  | -0.882 ↓ | -2.466 ↓ | -3.932 ↓ |
| <b>Ir-N<sub>4</sub>S</b> | 0.180 ↑  | -0.576 ↓ | -2.278 ↑ | -3.751 ↓ |

|                          |         |         |          |          |
|--------------------------|---------|---------|----------|----------|
| <b>Pt-N<sub>4</sub></b>  | 0.867   | 0.532   | -0.214   | -2.465   |
| <b>Pt-N<sub>4</sub>P</b> | 0.980 ↑ | 0.202 ↓ | -0.280 ↓ | -2.633 ↓ |
| <b>Pt-N<sub>4</sub>S</b> | 0.972 ↑ | 0.219 ↓ | -0.146 ↑ | -2.415 ↑ |
| <b>Au-N<sub>4</sub></b>  | 0.133   | 0.241   | -0.182   | -2.632   |
| <b>Au-N<sub>4</sub>P</b> | 0.258 ↑ | 0.152 ↓ | -0.666 ↓ | -2.484 ↑ |
| <b>Au-N<sub>4</sub>S</b> | 0.190 ↑ | 0.216 ↓ | -0.126 ↑ | -2.650 ↓ |

Table 7. The Mulliken charges of metal sites on B-doped M-N<sub>4</sub> which is doped by 0~4 B atoms.

|                         | <b>0 B</b> | <b>1 B</b> | <b>2 B</b> | <b>3 B</b> | <b>4 B</b> |
|-------------------------|------------|------------|------------|------------|------------|
| <b>Cr-N<sub>4</sub></b> | 0.459      | 0.485      | 0.505      | 0.540      | 0.562      |
| <b>Mn-N<sub>4</sub></b> | 0.400      | 0.445      | 0.487      | 0.503      | 0.515      |
| <b>Fe-N<sub>4</sub></b> | 0.185      | 0.228      | 0.276      | 0.317      | 0.361      |
| <b>Co-N<sub>4</sub></b> | 0.055      | 0.092      | 0.135      | 0.171      | 0.203      |
| <b>Ni-N<sub>4</sub></b> | 0.081      | 0.083      | 0.090      | 0.119      | 0.142      |
| <b>Cu-N<sub>4</sub></b> | 0.391      | 0.403      | 0.422      | 0.422      | 0.433      |
| <b>Zn-N<sub>4</sub></b> | 0.359      | 0.381      | 0.407      | 0.411      | 0.424      |
| <b>Ru-N<sub>4</sub></b> | 0.452      | 0.500      | 0.521      | 0.543      | 0.582      |
| <b>Rh-N<sub>4</sub></b> | 0.300      | 0.331      | 0.361      | 0.410      | 0.444      |
| <b>Pd-N<sub>4</sub></b> | 0.336      | 0.370      | 0.336      | 0.362      | 0.375      |
| <b>Ag-N<sub>4</sub></b> | 0.457      | 0.492      | 0.512      | 0.525      | 0.524      |
| <b>Ir-N<sub>4</sub></b> | 0.114      | 0.140      | 0.167      | 0.197      | 0.230      |
| <b>Pt-N<sub>4</sub></b> | 0.102      | 0.091      | 0.093      | 0.099      | 0.125      |
| <b>Au-N<sub>4</sub></b> | 0.284      | 0.273      | 0.263      | 0.251      | 0.247      |

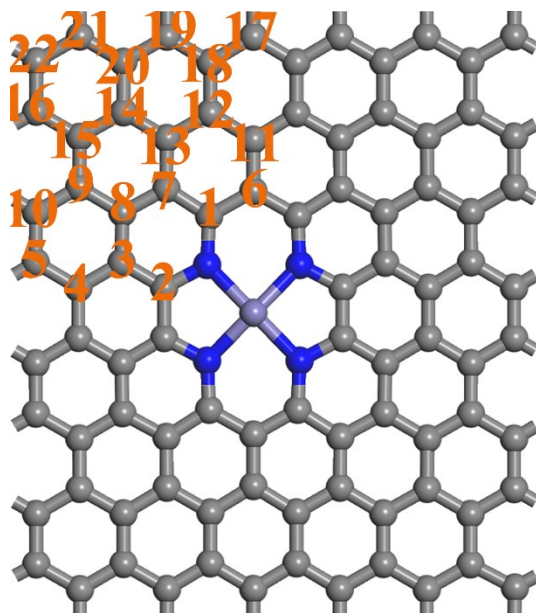

**Figure S1.** The graphite model used in calculation. Grey, carbon. Blue, nitrogen. Purple, metal atom. Orange number is used to mark doped site.

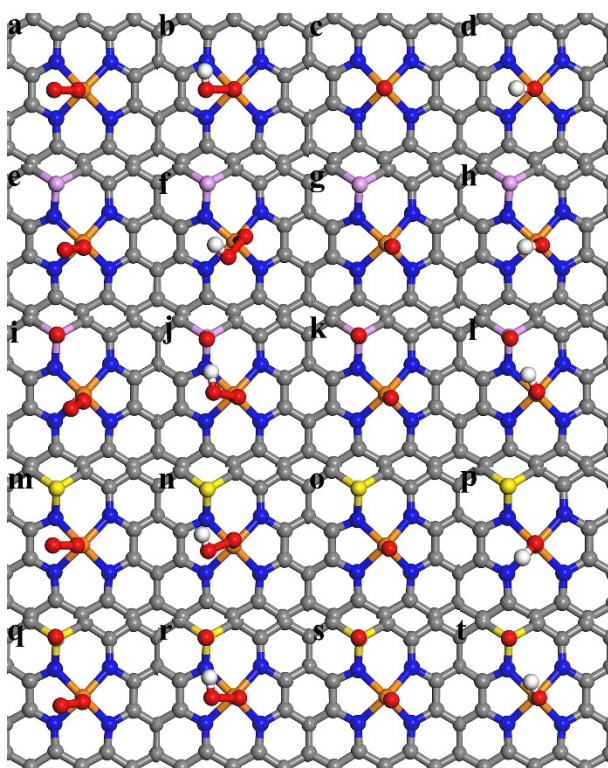

**Figure S2.** Structures of Cr-N<sub>4</sub> with intermediate adsorbates. (a-d) none-doped Mn-N<sub>4</sub>, (e-h) P-doped Mn-N<sub>4</sub> without oxidation, (i-l) P-doped Mn-N<sub>4</sub> with oxidation, (m-p) S-doped Mn-N<sub>4</sub> without oxidation, (q-t) S-doped Mn-N<sub>4</sub> with oxidation. Brown, Cr.

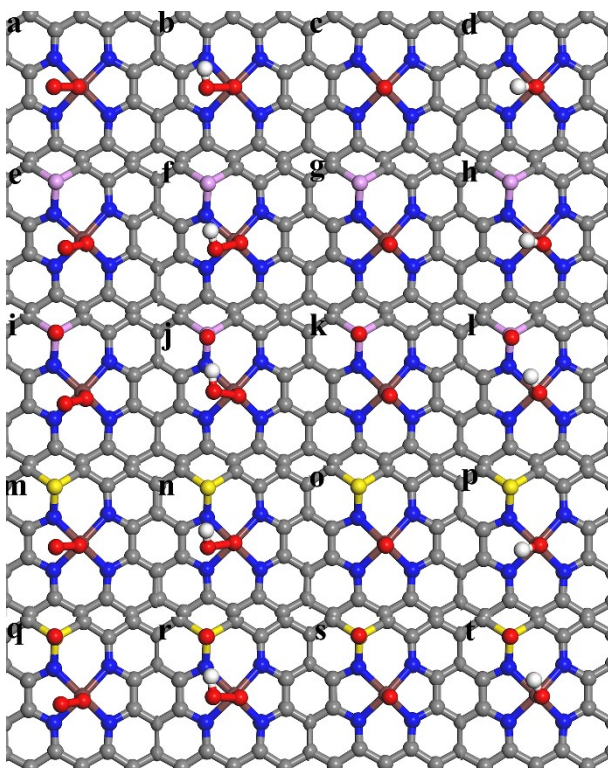

**Figure S3.** Structures of Mn-N<sub>4</sub> with intermediate adsorbates. (a-d) none-doped Mn-N<sub>4</sub>, (e-h) P-doped Mn-N<sub>4</sub> without oxidation, (i-l) P-doped Mn-N<sub>4</sub> with oxidation, (m-p) S-doped Mn-N<sub>4</sub> without oxidation, (q-t) S-doped Mn-N<sub>4</sub> with oxidation. Brown, Cr.

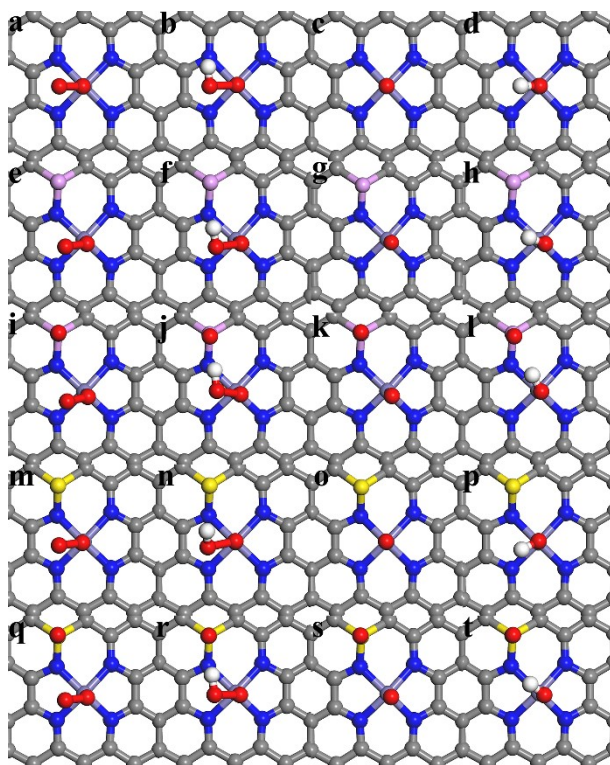

**Figure S4.** Structures of Fe-N<sub>4</sub> with intermediate adsorbates. (a-d) none-doped Fe-N<sub>4</sub>, (e-h) P-doped Fe-N<sub>4</sub> without oxidation, (i-l) P-doped Fe-N<sub>4</sub> with oxidation, (m-p) S-doped Fe-N<sub>4</sub> without oxidation, (q-t) S-doped Fe-N<sub>4</sub> with oxidation. Purple, Fe.

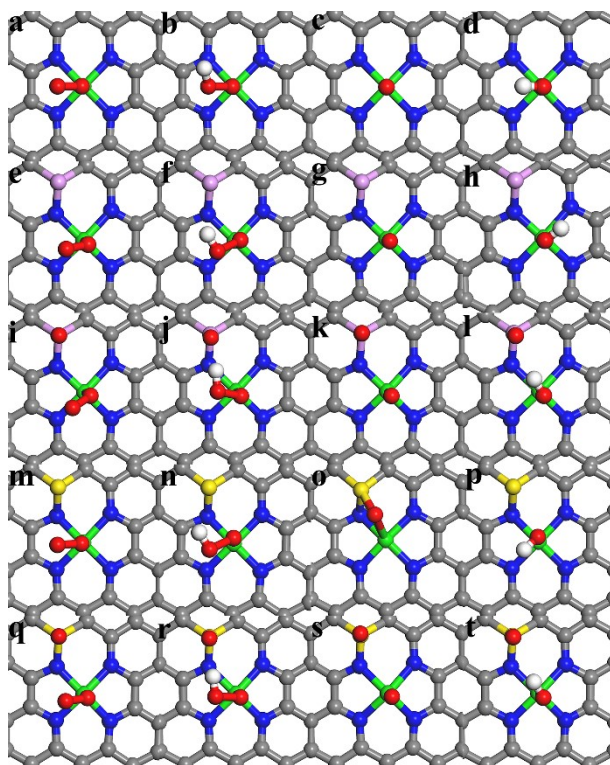

**Figure S5.** Structures of Co-N<sub>4</sub> with intermediate adsorbates. (a-d) none-doped Co-N<sub>4</sub>, (e-h) P-doped Co-N<sub>4</sub> without oxidation, (i-l) P-doped Co-N<sub>4</sub> with oxidation, (m-p) S-doped Co-N<sub>4</sub> without oxidation, (q-t) S-doped Co-N<sub>4</sub> with oxidation.

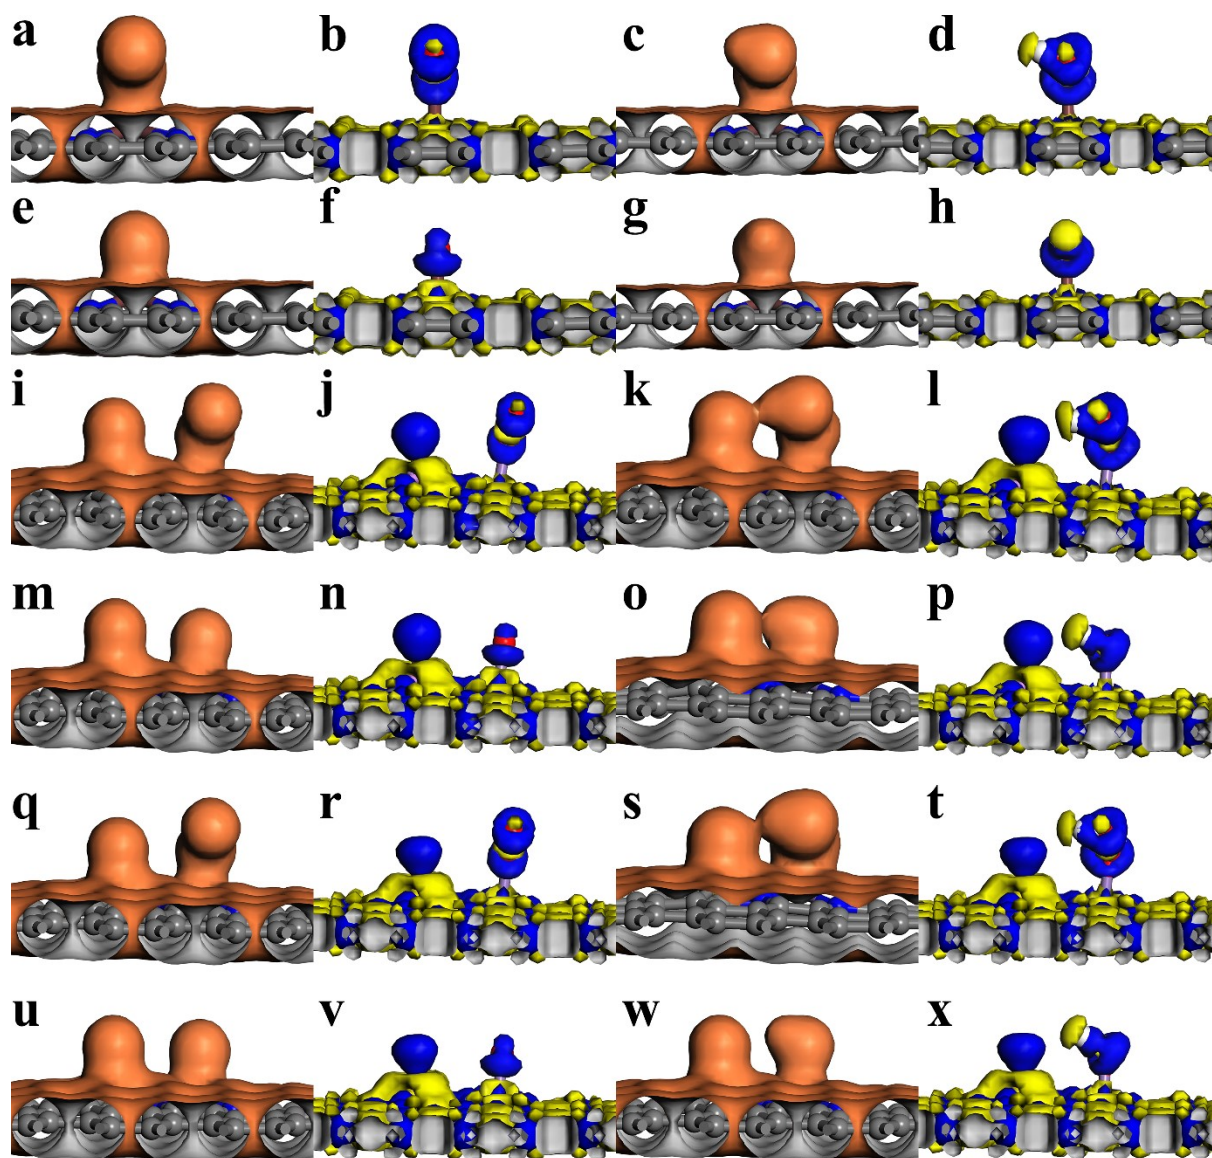

Figure S6. The total and deformation electron density of ORR intermediates ( $\text{O}_2^*/\text{OOH}^*/\text{O}^*/\text{OH}^*$ ) on (a-h) non-doped  $\text{Mn-N}_4$  (i-p) P-doped  $\text{Mn-N}_4$  (q-x) S-doped  $\text{Mn-N}_4$ . The orange area is total electron density, the blue area is negative electron density and the yellow area is positive electron density. The values of isovalue of total electron and deformation electron density are  $0.2 \text{ e}/\text{\AA}^3$  and  $0.06 \text{ e}/\text{\AA}^3$ .



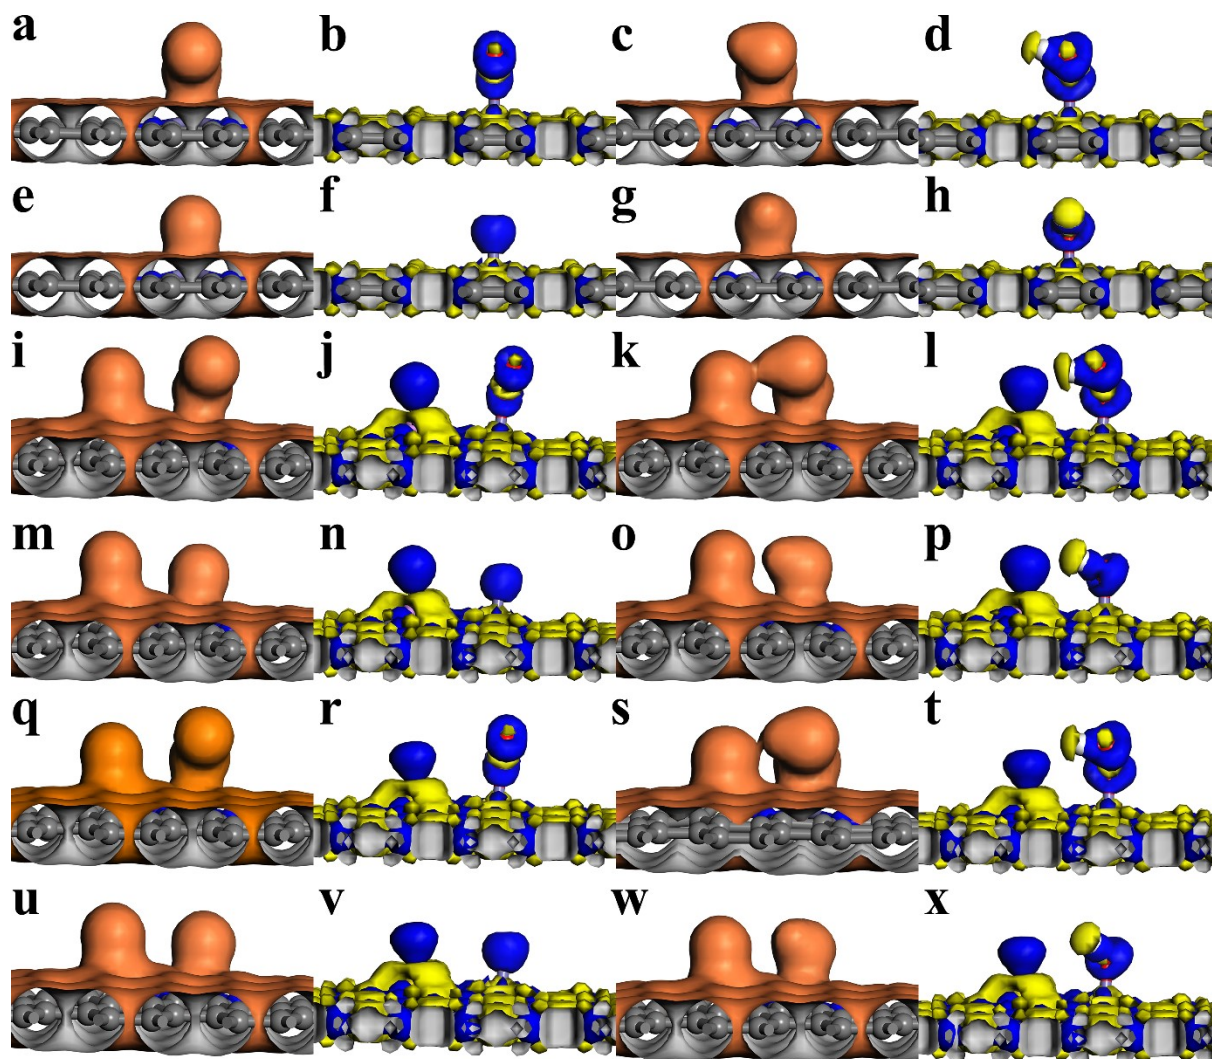

Figure S7. The total and deformation electron density of ORR intermediates ( $O_2^*/OOH^*/O^*/OH^*$ ) on (a-h) non-doped Fe-N<sub>4</sub> (i-p) P-doped Fe-N<sub>4</sub> (q-x) S-doped Fe-N<sub>4</sub>.

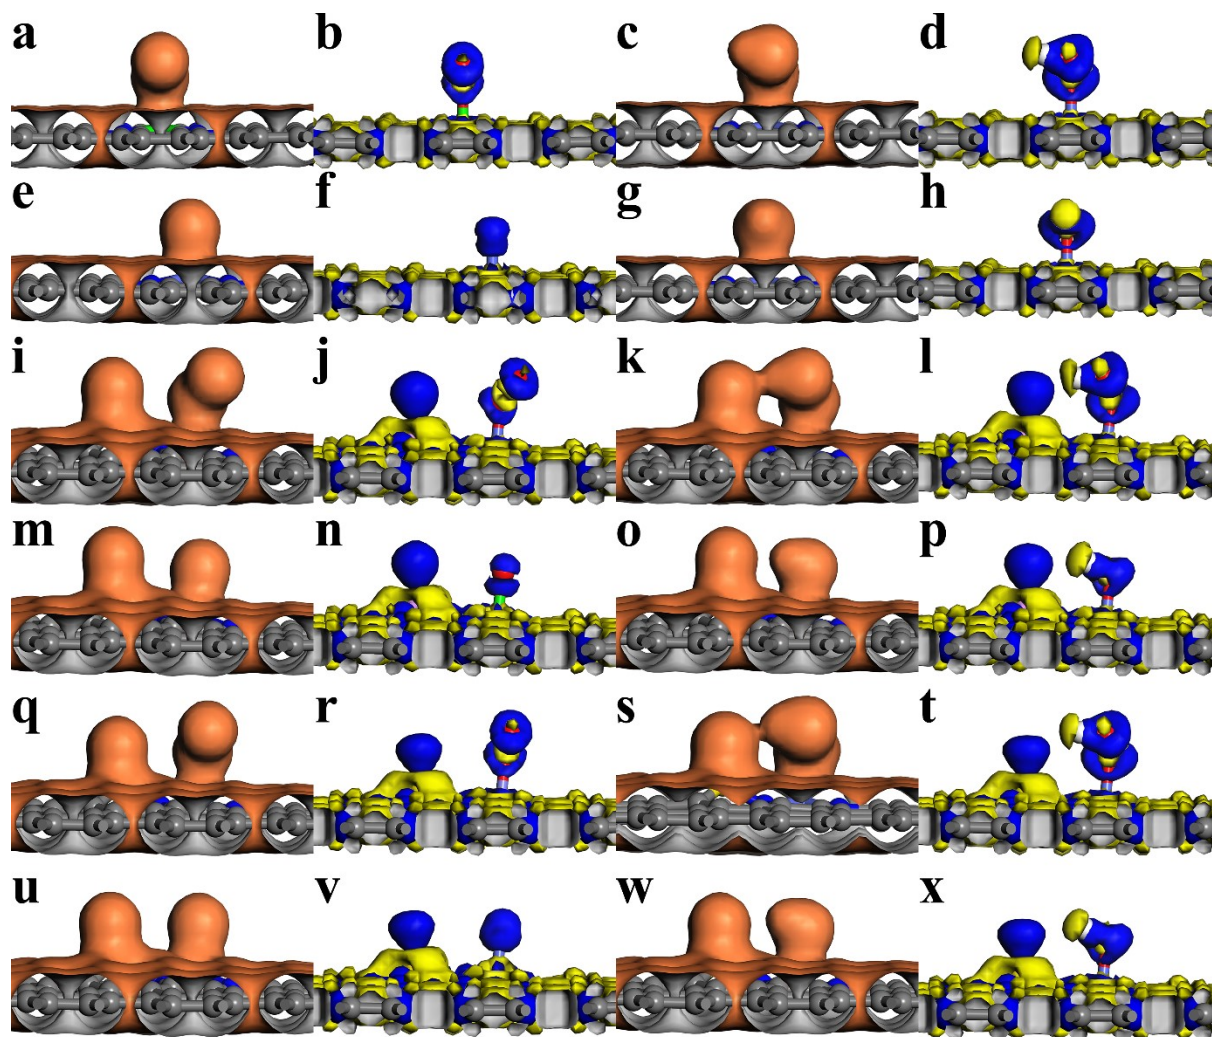

Figure S8. The total and deformation electron density of ORR intermediates ( $O_2^*/OOH^*/O^*/OH^*$ ) on (a-h) non-doped Co-N<sub>4</sub> (i-p) P-doped Co-N<sub>4</sub> (q-x) S-doped Co-N<sub>4</sub>.

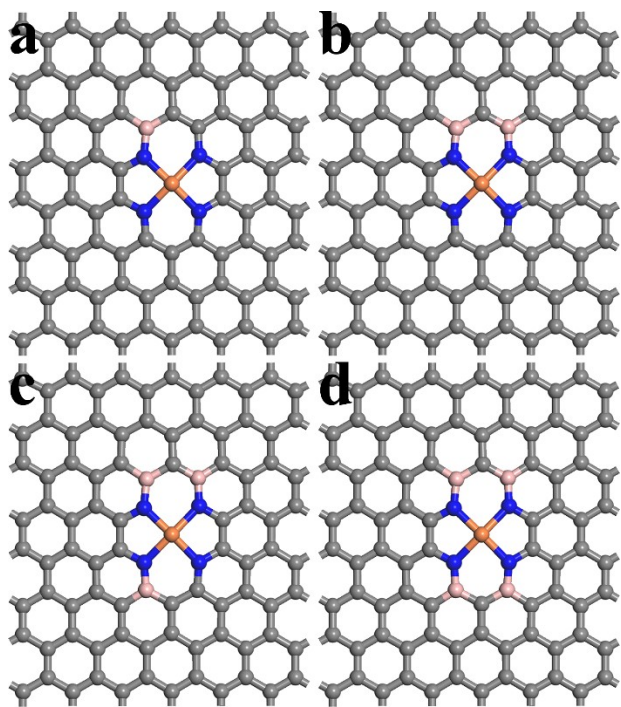

**Figure S9.** Structures of B doped M-N<sub>4</sub>. Pink, B atom. Blue, nitrogen atom. Orange, metal atom. Grey, carbon atom.

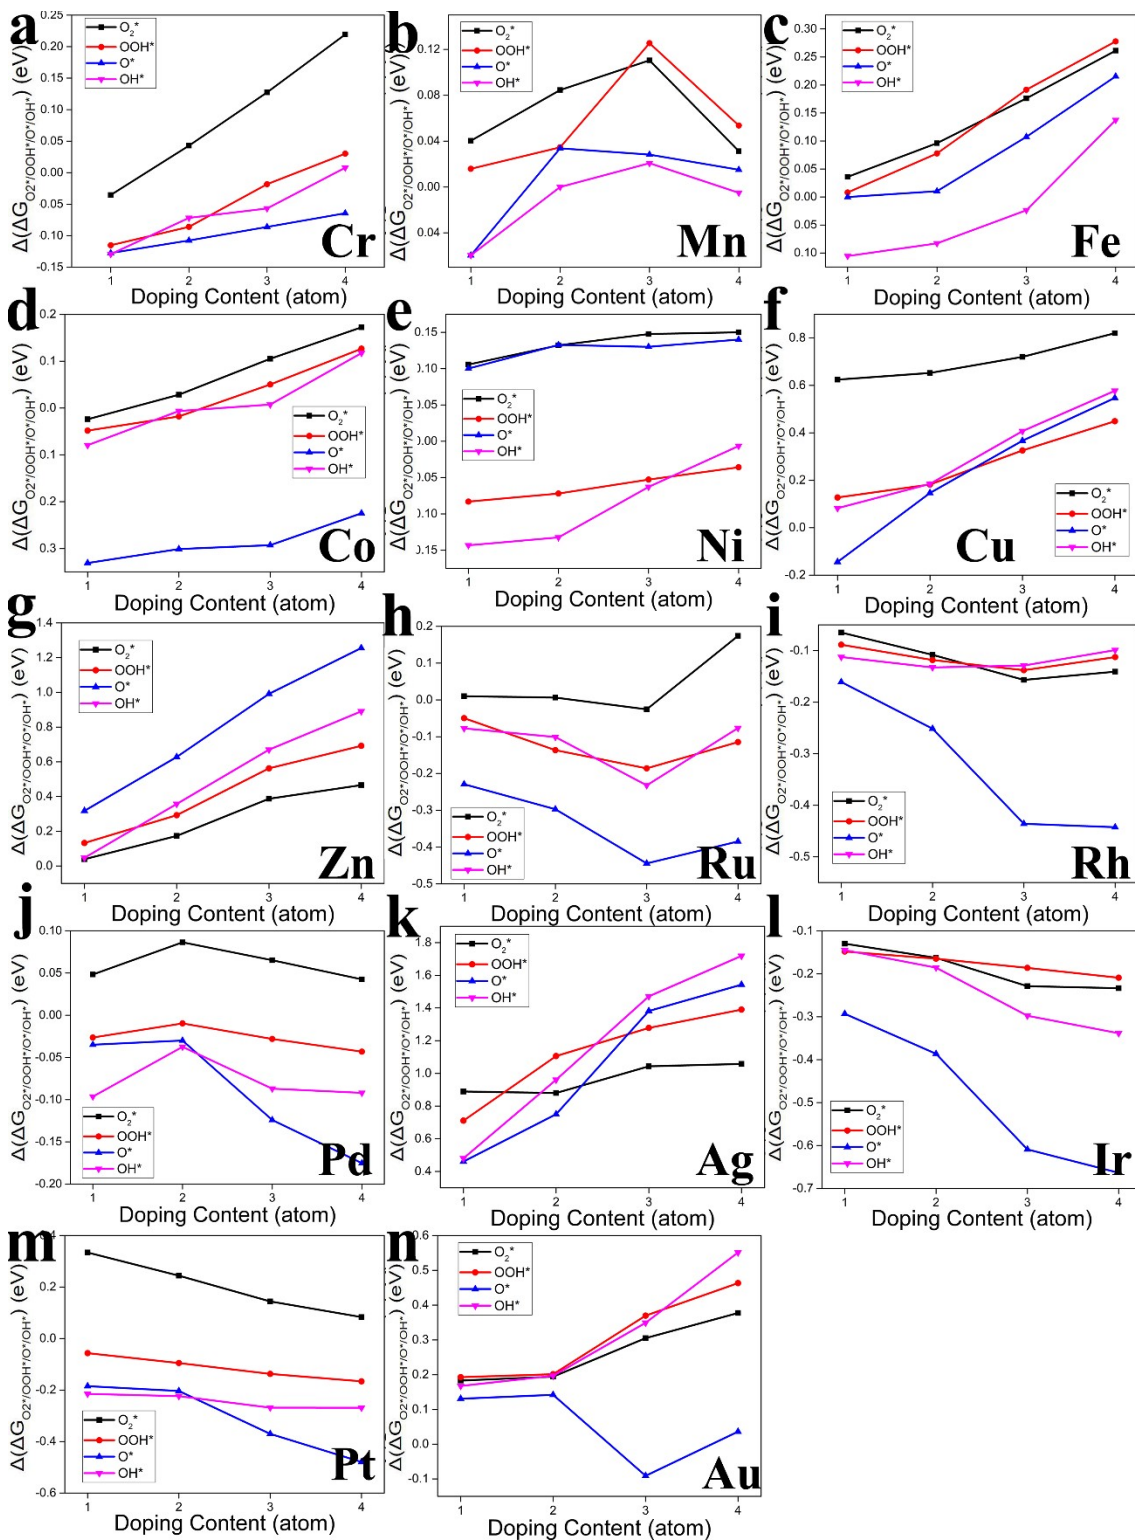

**Figure 10.** The change of adsorption energies after B doping and the energies released in the elementary reactions. For example,  $\Delta(\Delta G_{O_2^*})$  is the difference between  $\Delta G_{O_2^*}$  on B-doped M-N<sub>4</sub> and that on non-doped M-N<sub>4</sub>.

## REFERENCE

- [1] Delley, B. An All-electron Numerical Method for Solving the Local Density Functional for Polyatomic Molecules. *J. Chem Phys.*, **1990**, 92, 508.
- [2] Delley, B. From Molecules to Solids with the DMol<sup>3</sup> Approach. *J. Chem. Phys.*, **2000**, 113, 7756-7764.
- [3] Perdew, J. P.; Burke, K.; Ernzerhof, M. Generalized Gradient Approximation Made Simple. *Phys. Rev. Lett.* **1996**, 77, 3865-3868.
- [4] Grimme, S. Semiempirical GGA-type Density Functional Constructed with a Long-range Dispersion Correction *J. Comp. Chem.*, **2006**, 27, 1787.
- [5] Hamann, D. R.; Schluter, M.; Chiang, C. Norm-conserving Pseudopotentials. *Phys. Rev. Lett.*, **1979**, 43, 1494-1497.
- [6] Hammer, B.; Nørskov, J. K. Why Gold Is the Noblest of All the Metals *Nature*, **1995**, 376, 238.
- [7] Nørskov, J. K.; Bligaard, T.; Logadottir, A.; Kitchin, J. R.; Chen, J. G.; Pandelov, S.; Stimming, U. Trends in the Exchange Current for Hydrogen Evolution. *J. Electrochem. Soc.*, **2005**, 152, J23-J26.
- [8] X. Guo, J. Gu, S. Lin, S. Zhang, Z. Chen, S. Huang. *J. Am. Chem. Soc.* **2020**, 142, 5709–5721.
